# Supplementary material for: Comprehensive Study of Traditional Plant Ground Ivy (Glechoma hederacea L.) Grown in Croatia in Terms of Nutritional and Bioactive Composition
Source: MDPI journal article supplement (doi:10.3390/foods11050658), 2022-02-23
Supplement: s1 [file s1]

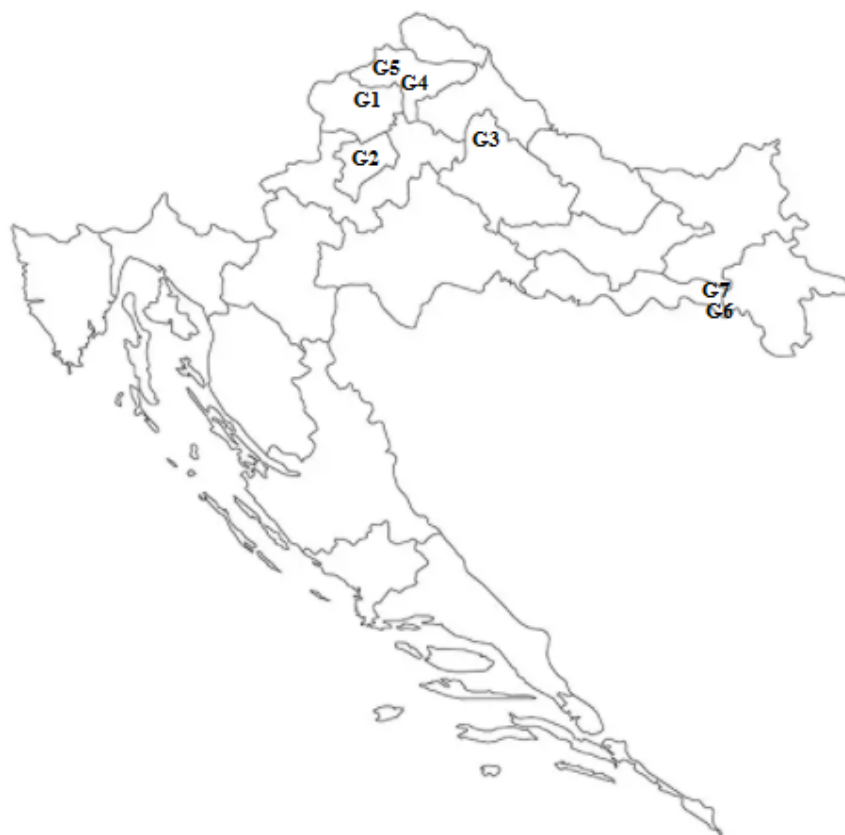

**Figure S1.** Geographical location of the ground ivy collection places

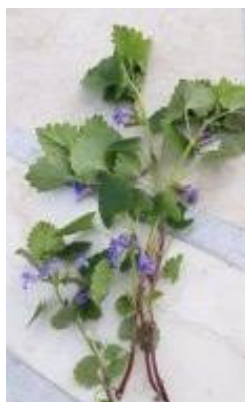

**Figure S2.** Sample of collected ground ivy (sample G3)

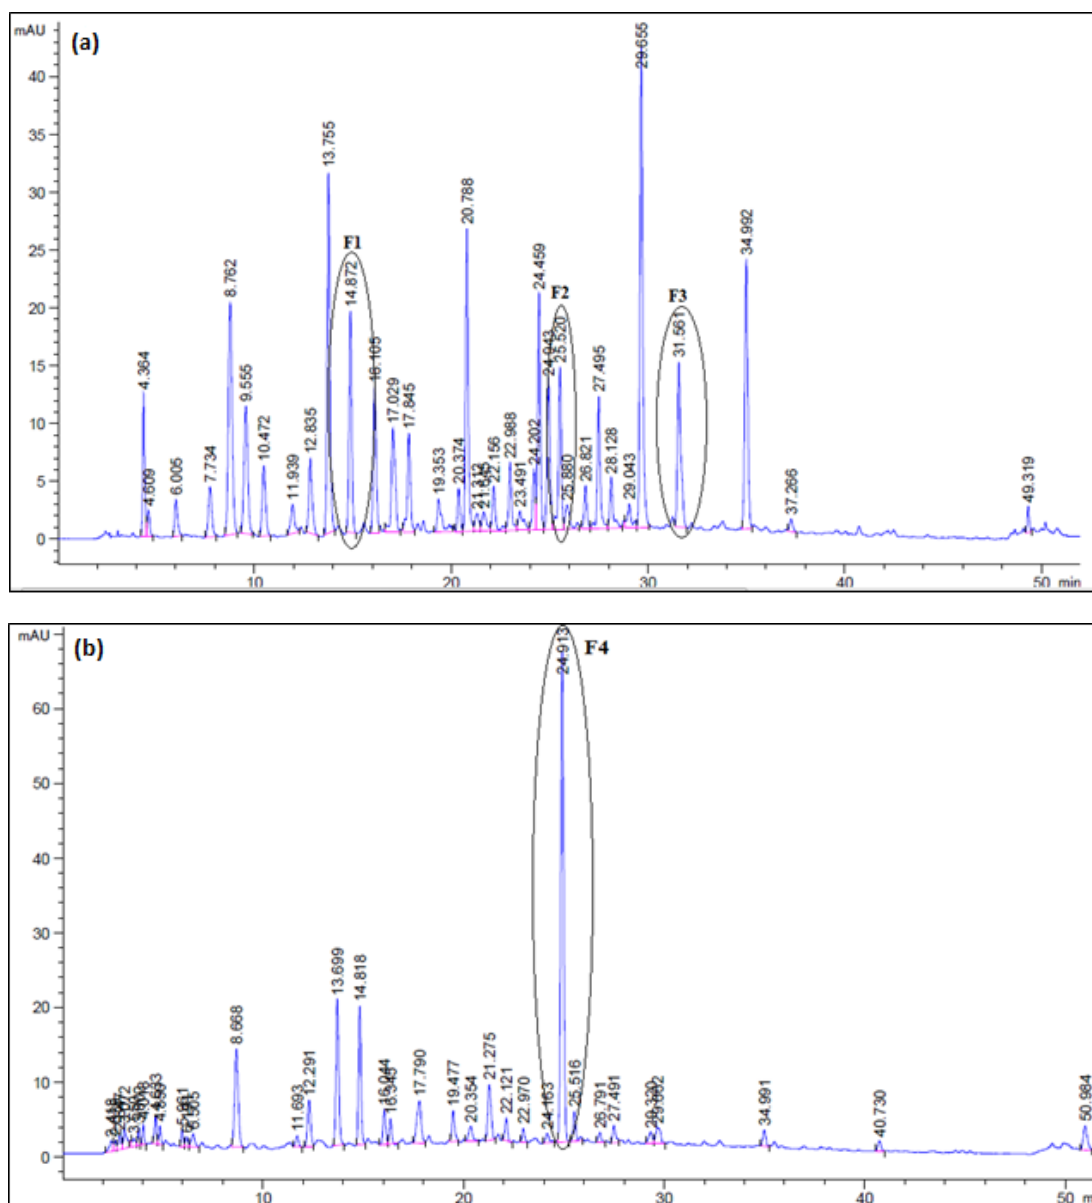

**Figure S3.** HPLC chromatograms (recorded at 320 nm) of a) MAE extract and (b) SWE extract of sample G5

## MS/MS fragmentation profiles of unknown peaks from ground ivy

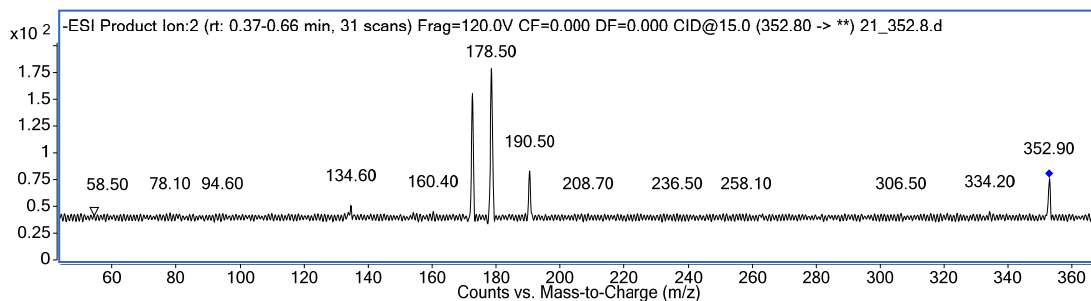

Figure S4. Fragmentation profile of the most dominant ion detected in F1,  $m/z$  353

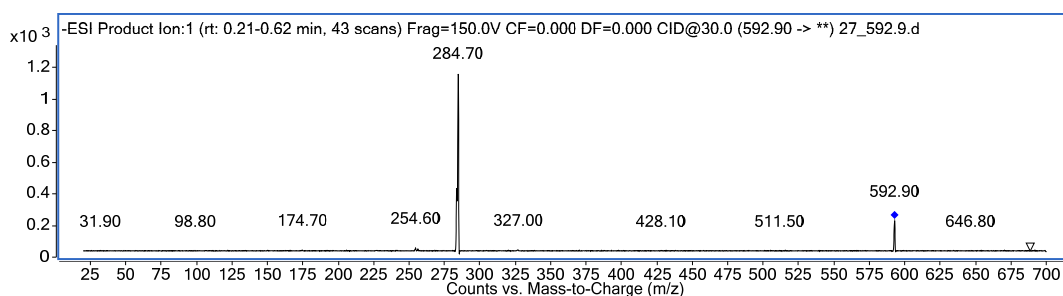

Figure S5. Fragmentation profile of the most dominant ion detected in F2,  $m/z$  593

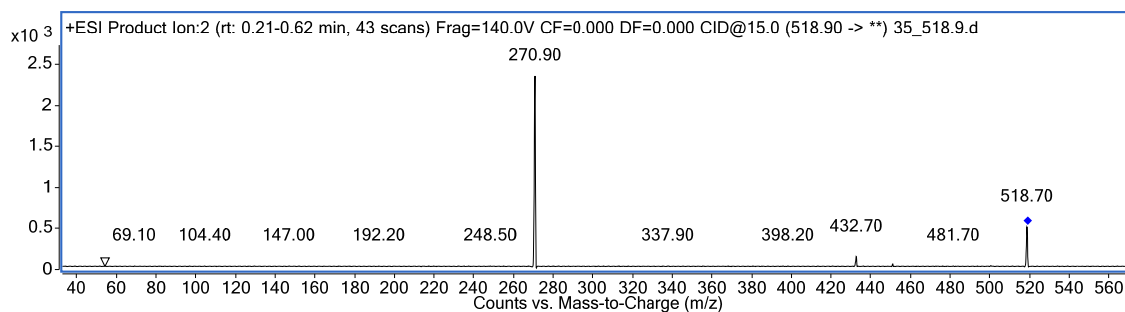

Figure S6. Fragmentation profile of the most dominant ion detected in F3,  $m/z$  519

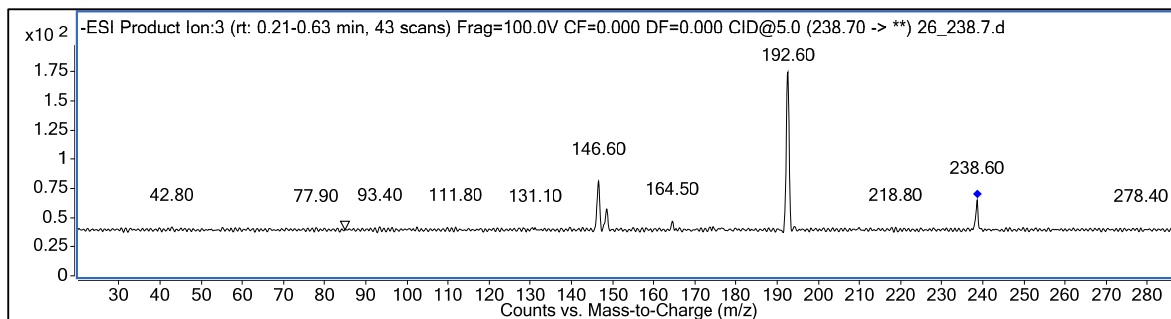

Figure S7. Fragmentation profile of the most dominant ion detected in F4,  $m/z$  239
